# Supplementary material
Source: PubMed Central journal article supplement (PMC4639916)

Figure S1

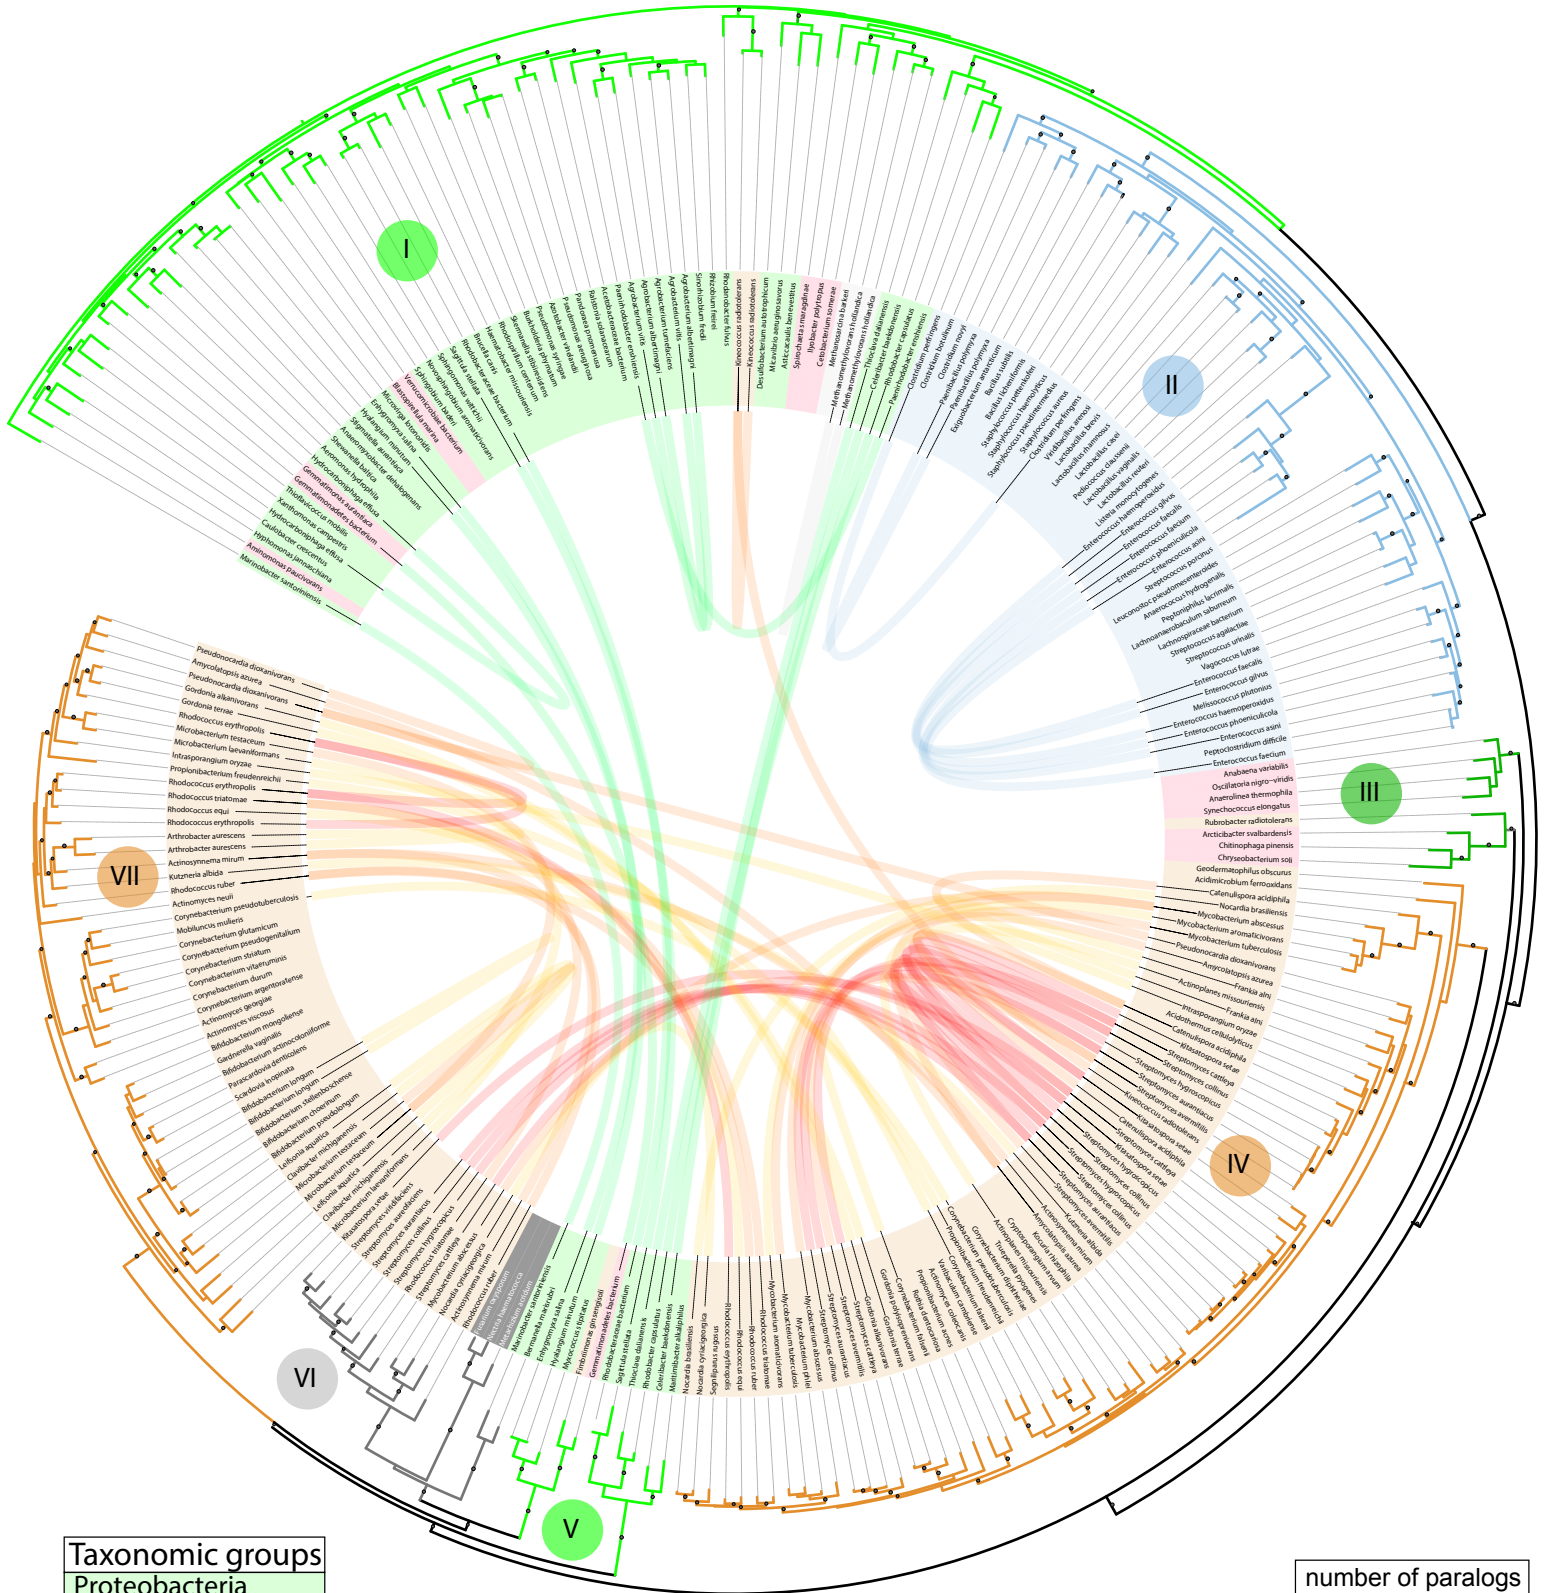

| Taxonomic groups         |  |
|--------------------------|--|
| Proteobacteria           |  |
| Other phyla <sup>a</sup> |  |
| Firmicutes               |  |
| Actinobacteria           |  |
| Archaea                  |  |
| Eukaryotes               |  |

|                                         | number of paralogs |
|-----------------------------------------|--------------------|
| Proteobacteria/Other phyla <sup>a</sup> | 2                  |
| Firmicutes                              | 2                  |
| Actinobacteria                          | 2                  |
|                                         | 3                  |
|                                         | 4-5                |

Figure S2

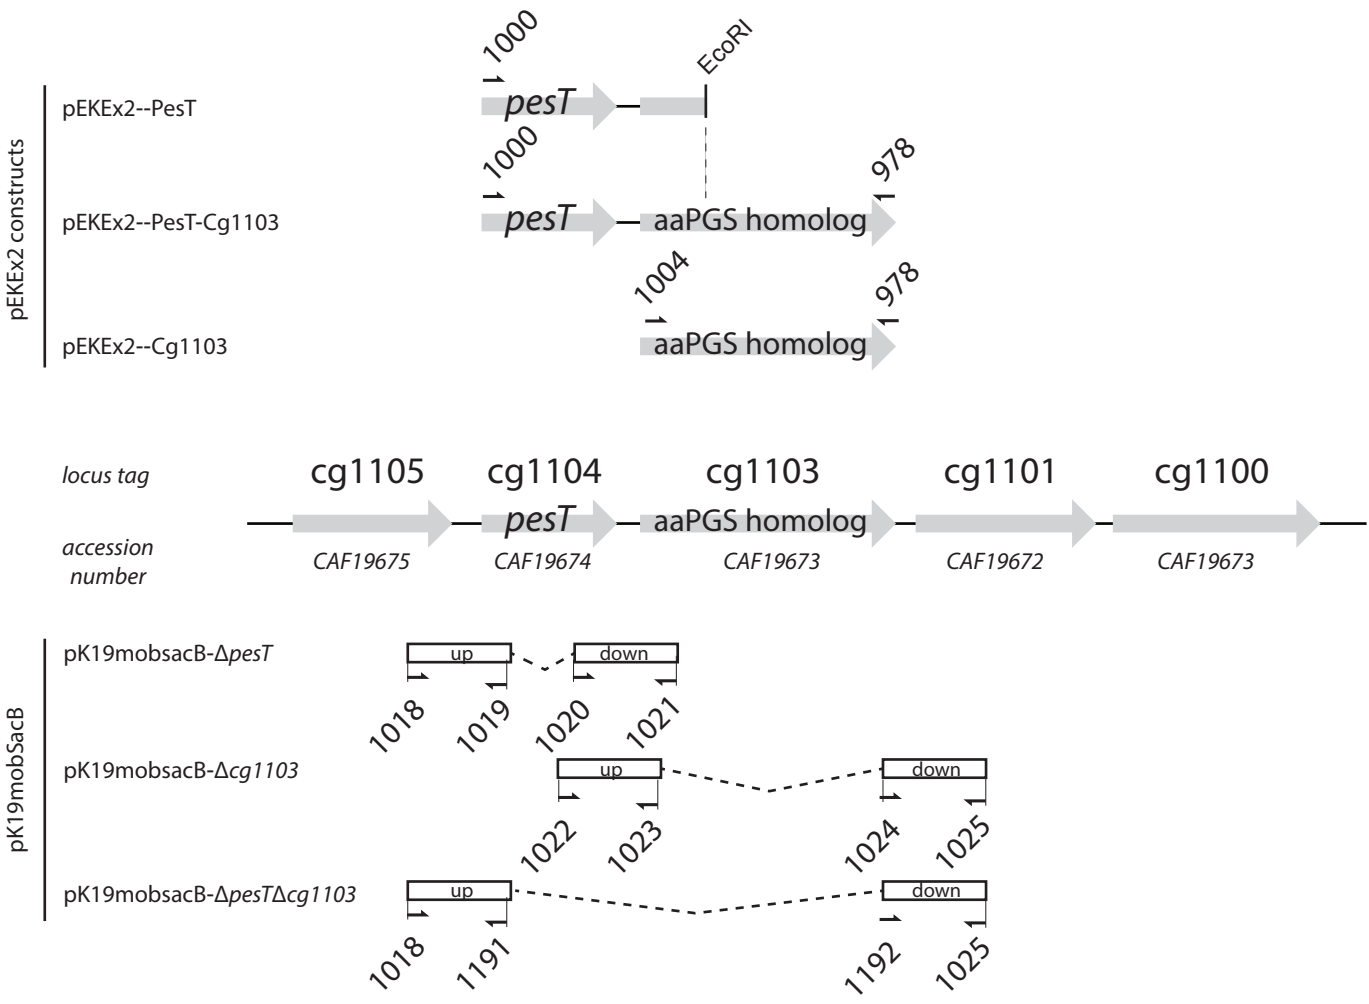

Figure S3

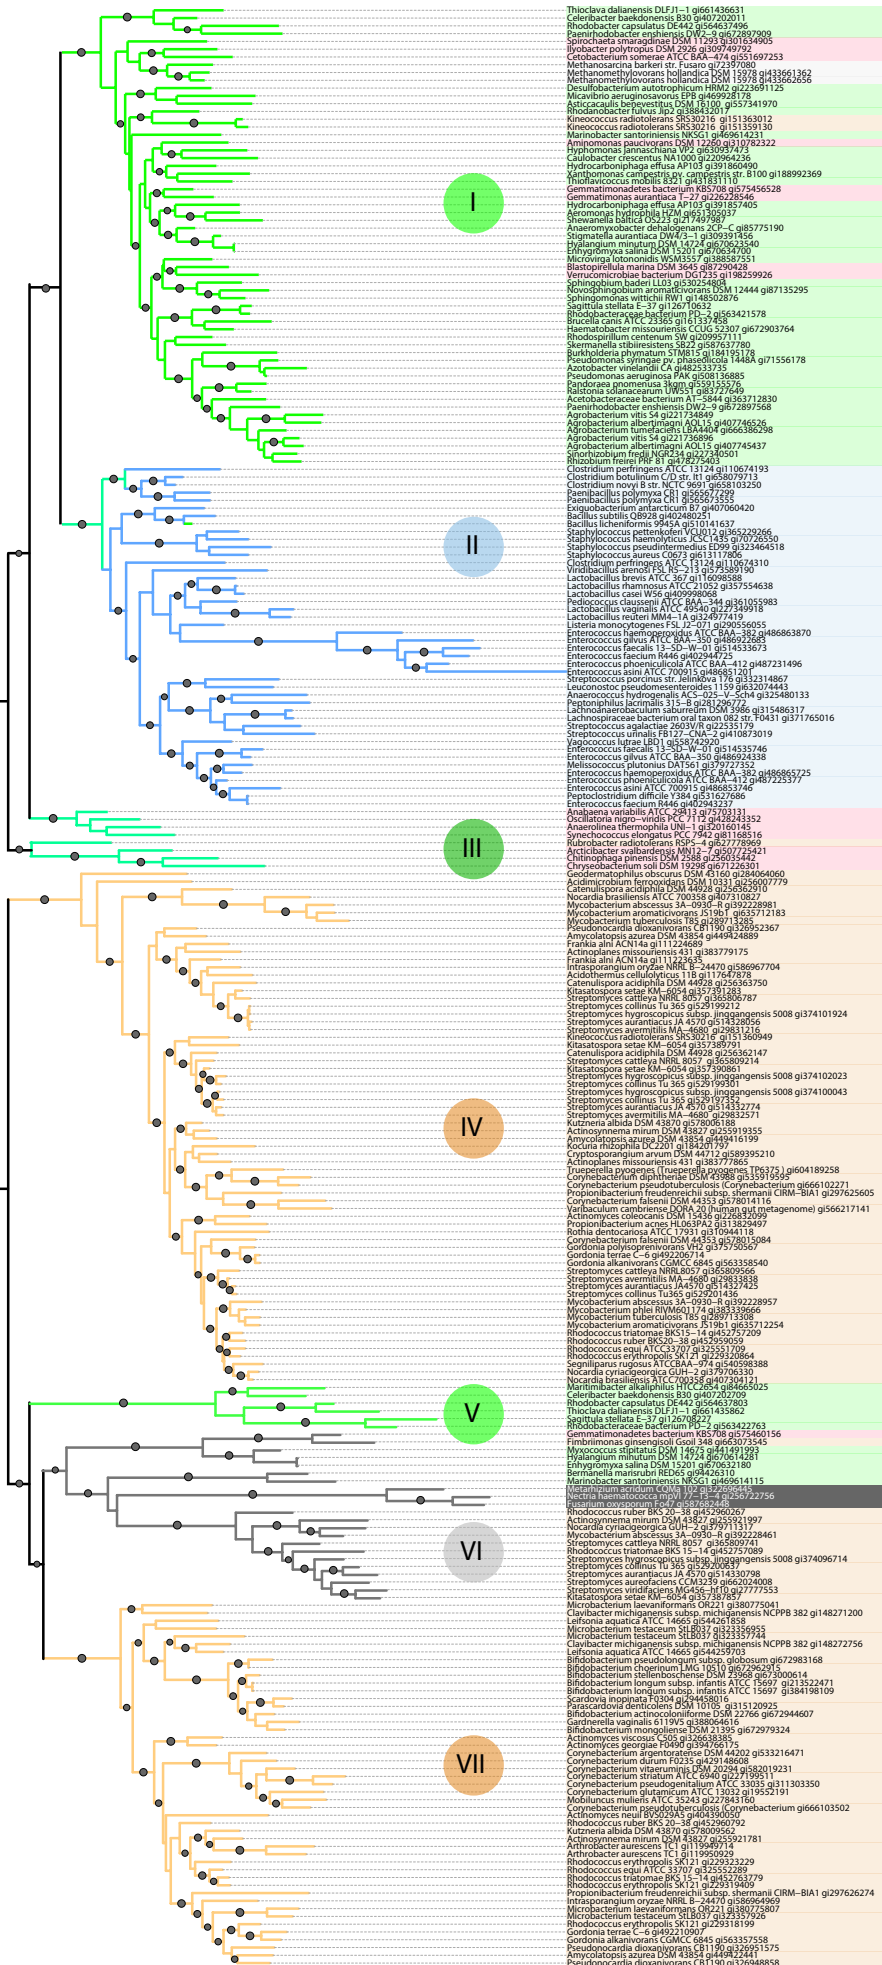

| Taxonomic groups         |
|--------------------------|
| Proteobacteria           |
| Other phyla <sup>a</sup> |
| Firmicutes               |
| Actinobacteria           |
| Archaea                  |
| Eukaryotes               |

Figure S4

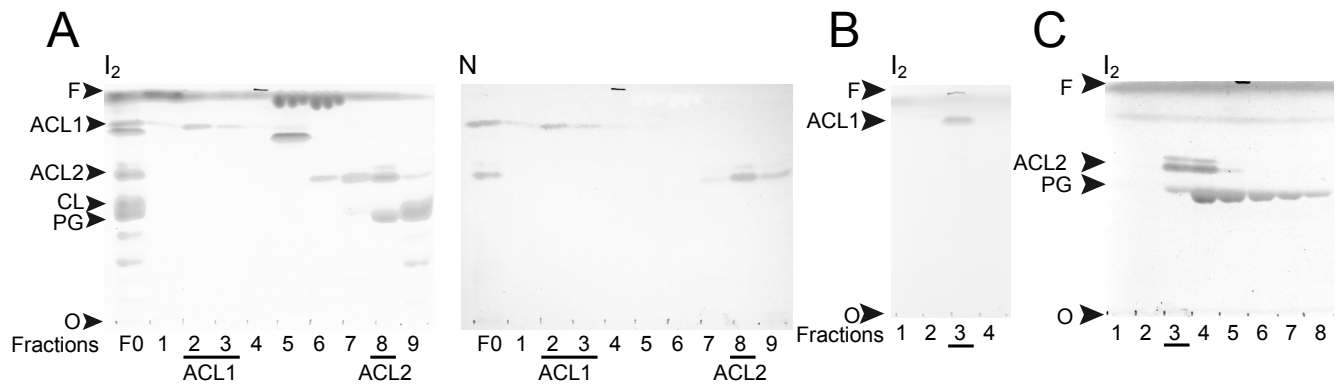

Figure S5

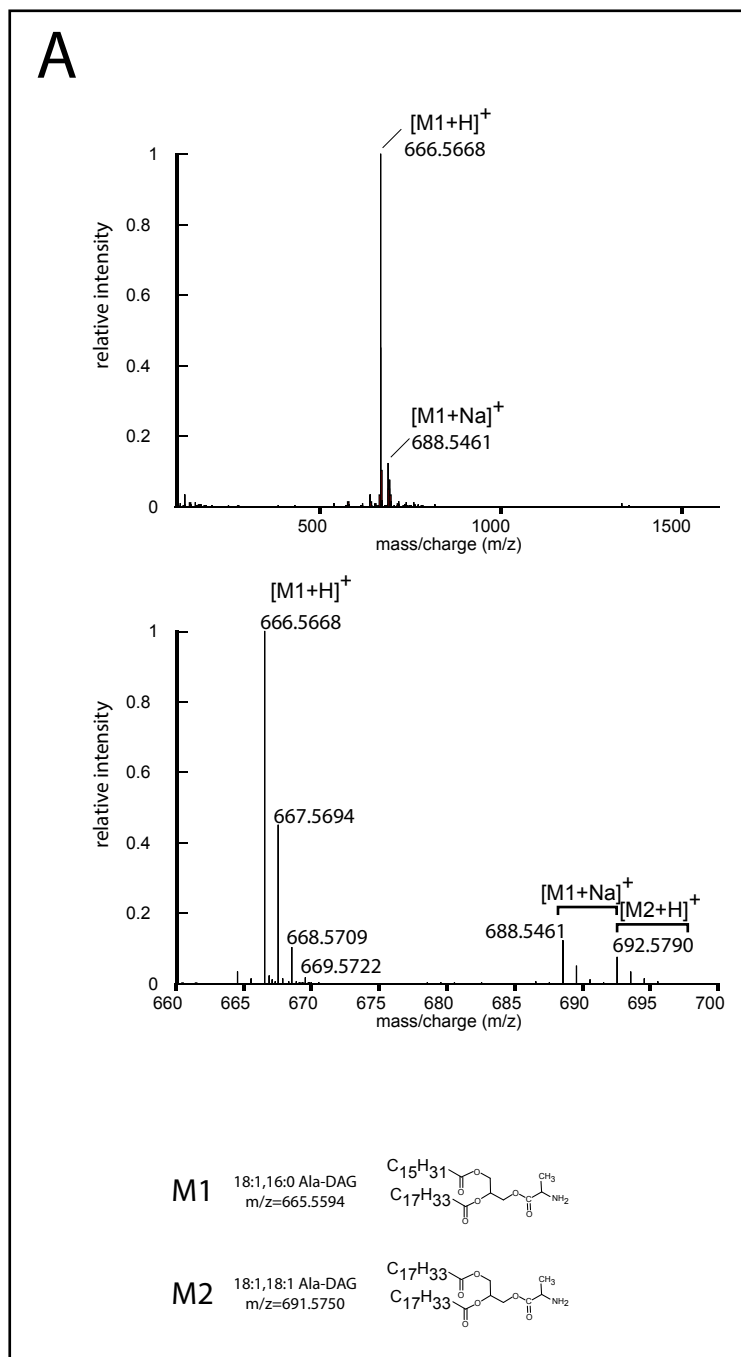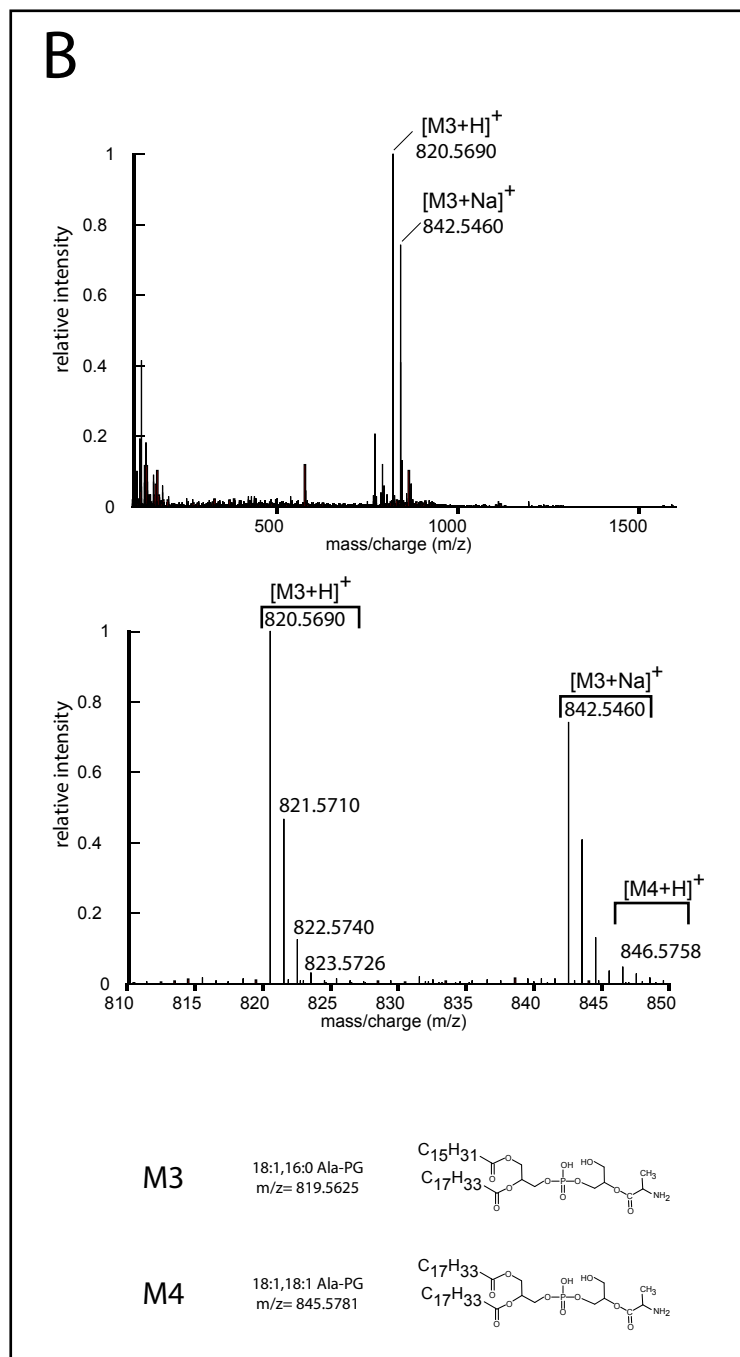

Supplement: NIHMS733861-supplement-Supp_FigureS1-S5.pdf [file NIHMS733861-supplement-Supp_FigureS1-S5.pdf]
